# Supplementary material for: Natural and Mechanical Ventilation Concepts for Indoor Comfort and Well-Being with a Sustainable Design Perspective: A Systematic Review
Source: MDPI journal article supplement (doi:10.3390/buildings12111983), 2022-11-15
Supplement: s1 [file s1]

Archive with 1 entries (1 files):
- buildings-2007218-supplementary.pdf
